# Supplementary material for: Safety of Oral Carica papaya L. Leaf 10% Ethanolic Extract for Acute and Chronic Toxicity Tests in Sprague Dawley Rats
Source: MDPI journal article supplement (doi:10.3390/toxics12030198), 2024-03-01
Supplement: s1 [file s1]

Supplementary Data

# Safety of Oral *Carica papaya* L. Ethanolic Extract from Acute and Chronic Toxicity Tests in Sprague-Dawley Rats

**Table S1.** Pesticide residue examination results.

| Organochlorines group        | Results (mg/kg) | Organochlorines group  | Results (mg/kg) |
|------------------------------|-----------------|------------------------|-----------------|
| $\alpha$ -BHC                | not found       | Endosulfan I           | not found       |
| $\gamma$ -BHC (Lindane)      | not found       | Dieldrin               | not found       |
| $\beta$ -BHC                 | not found       | Endrin                 | not found       |
| $\delta$ -BHC                | not found       | 4,4'-DDD               | not found       |
| Heptaclor                    | not found       | Endosulfan II          | not found       |
| Aldrin                       | not found       | 4,4'-DDT               | not found       |
| Heptaclor epoxide (Isomer B) | not found       | Endrin aldehyde        | not found       |
| Trans-Chlordane              | not found       | Methoxychor            | not found       |
| Cis-Chlordane                | not found       | Endosulfan sulfate     | not found       |
| 4-4'-DDE                     | not found       | Endrin ketone          | not found       |
| Organophosphates group       | Results (mg/kg) | Organophosphates group | Results (mg/kg) |
| Diazinon                     | not found       | Chlopyrifos            | not found       |
| Parathion-methyl             | not found       | Pirimiphos-ethyl       | not found       |
| Fenitrothion                 | not found       | Profenofos             | not found       |
| Malathion                    | not found       | Ethion                 | not found       |
| Pyrethroids group            | Results (mg/kg) | Pyrethroids group      | Results (mg/kg) |
| Lamda-cyhalothrin            | not found       | Cypemethrin            | not found       |
| Pemethrin                    | not found       | Fenvarelat             | not found       |
| Cyfluthrin                   | not found       | Deltamethrin           | not found       |
| Carbamates group             | Results (mg/kg) | Carbamates group       | Results (mg/kg) |
| Aldicarb                     | not found       | Oxamyl                 | not found       |
| Aldicarb sulfine             | not found       | Pirimicarb             | not found       |
| Carbaryl                     | not found       | Promecarb              | not found       |
| Carbafuran                   | not found       | Ethimfos               | not found       |
| Methiocarb                   | not found       |                        |                 |

Note. Limit of Detection (LOD) = 0.01 mg/kg

**Table S2.** Types and contents of phenolic and flavonoid compounds in the analysis of production in each batch of papaya leaf extract.

| Compounds       | Quantity detected (mg/ 100 g dry extract) |             |             |             |
|-----------------|-------------------------------------------|-------------|-------------|-------------|
|                 | Batch No.1                                | Batch No.2  | Batch No.3  | Batch No.4  |
| Gallic acid     | 873.5 ± 8.5                               | 845.7 ± 7.3 | 921.5 ± 8.2 | 895.6 ± 7.5 |
| Rutin           | 1043 ± 7.2                                | 978.6 ± 6.9 | 1105 ± 7.4  | 1082 ± 6.5  |
| Catechin        | 421.5 ± 5.8                               | 413.2 ± 4.6 | 409.8 ± 5.2 | 453.6 ± 4.9 |
| Rosmarinic acid | nd                                        | nd          | nd          | nd          |
| Luteolin        | nd                                        | nd          | nd          | nd          |
| Quercetin       | 853.7 ± 6.4                               | 812.4 ± 5.7 | 887.6 ± 6.2 | 864.3 ± 5.2 |
| Apigenin        | 105.6 ± 4.8                               | 87.47 ± 3.5 | 119.6 ± 4.9 | 110.3 ± 3.7 |
| Kaempferol      | 18.56 ± 1.7                               | 17.03 ± 1.5 | 20.64 ± 2.2 | 19.58 ± 1.8 |

  

| Compounds       | Quantity detected (mg/ 100 g dry extract) |             |             |
|-----------------|-------------------------------------------|-------------|-------------|
|                 | Batch No.5                                | Batch No.6  | Batch No.7  |
| Gallic acid     | 882.6 ± 7.5                               | 915.6 ± 7.4 | 878.4 ± 6.8 |
| Rutin           | 1024 ± 8.7                                | 1087 ± 9.6  | 1051 ± 7.4  |
| Catechin        | 418.3 ± 5.4                               | 427.2 ± 6.6 | 420.6 ± 5.5 |
| Rosmarinic acid | nd                                        | nd          | nd          |
| Luteolin        | nd                                        | nd          | nd          |
| Quercetin       | 846.1 ± 6.3                               | 865.4 ± 7.0 | 852.9 ± 6.0 |
| Apigenin        | 107.3 ± 3.8                               | 112.6 ± 4.3 | 102.3 ± 3.5 |
| Kaempferol      | 21.52 ± 1.6                               | 22.78 ± 1.9 | 19.83 ± 1.7 |

Note. nd: not detectable

**Disclaimer/Publisher's Note:** The statements, opinions and data contained in all publications are solely those of the individual author(s) and contributor(s) and not of MDPI and/or the editor(s). MDPI and/or the editor(s) disclaim responsibility for any injury to people or property resulting from any ideas, methods, instructions or products referred to in the content.
